# Supplementary material for: Highly porous Ni–P electrode synthesized by an ultrafast electrodeposition process for efficient overall water electrolysis
Source: Royal Society of Chemistry journal article supplement (doi:10.1039/d0ta03739g), 2020-01-01
Supplement: d0ta03739g1.pdf [file d0ta03739g1.pdf]

## **Supplementary Information**

### **Highly Porous Ni-P Electrode Synthesized by an Ultrafast Electrodeposition Process for Efficient Overall Water Electrolysis**

DongHoon Song<sup>a</sup>, Doosun Hong<sup>a</sup>, YongKeun Kwon<sup>a</sup>, HyoWon Kim<sup>a</sup>, JaeWook Shin<sup>a,b</sup>, Hyuck Mo Lee<sup>a</sup> and EunAe Cho<sup>a\*</sup>

*<sup>a</sup>Department of Materials Science and Engineering, Korea Advanced Institute of Science and Technology (KAIST), 291 Daehak-ro, Yuseong-gu, Daejeon, 34141, Republic of Korea*

*<sup>b</sup>Advanced Battery Center, KAIST Institute for NanoCentury, Korea Advanced Institute of Science and Technology (KAIST), 291 Daehak-ro, Yuseong-gu, Daejeon 34141, Republic of Korea*

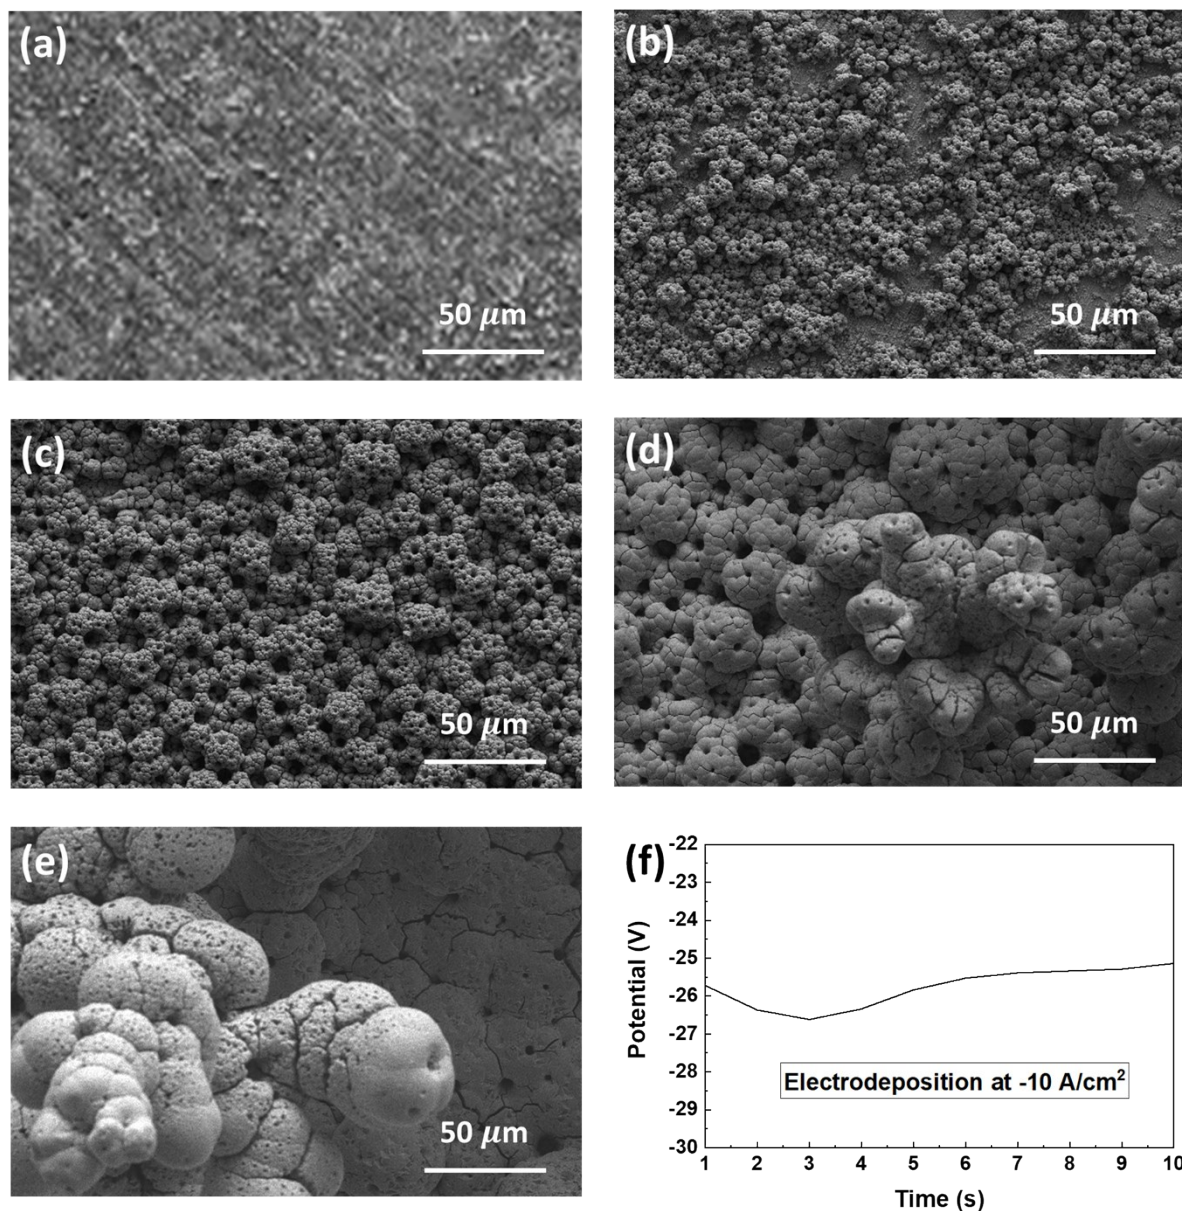

**Figure S1.** SEM images of the Ni-P electrodes deposited at  $-10 \text{ A/cm}^2$  for (a) 1, (b) 5, (c) 10, (d) 30, and (e) 60 seconds. (f) Voltage-time curve for the electrodeposition of Ni-P at  $-10 \text{ A/cm}^2$  during 10 seconds,

At the very early stage of the electrodeposition within 1 second, small Ni-P seed islands were formed on the surface of the substrate (Fig. S1a). After 5 seconds, Ni-P particles having a porous structure are observed with exposed substrate surfaces that are not covered with the Ni-P particles (Fig. S2b). After 10 seconds, the substrate surface is completely covered with the highly porous Ni-P layer (Fig. S1c). Upon further electrodeposition, denser Ni-P layers were formed with larger particles (Fig. S1d and e).

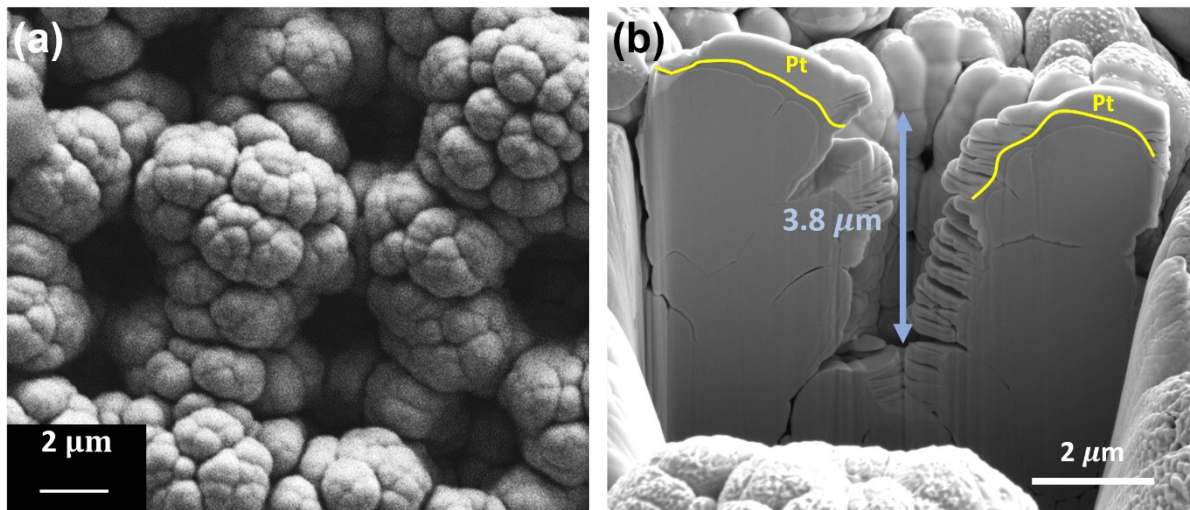

**Figure S2.** SEM images of the HP Ni-P; (a) surface and (b) cross sectional image in which the Pt layer was coated on top of the sample for protection from ion-beam damage during FIB milling.

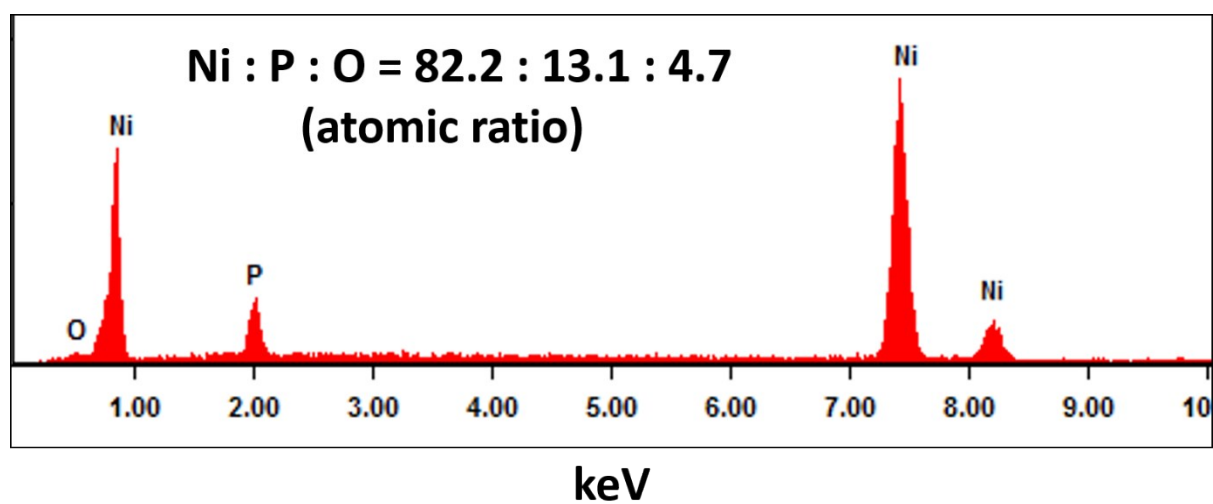

**Figure S3.** Spectra of SEM energy dispersive spectroscopy analysis of the HP Ni-P.

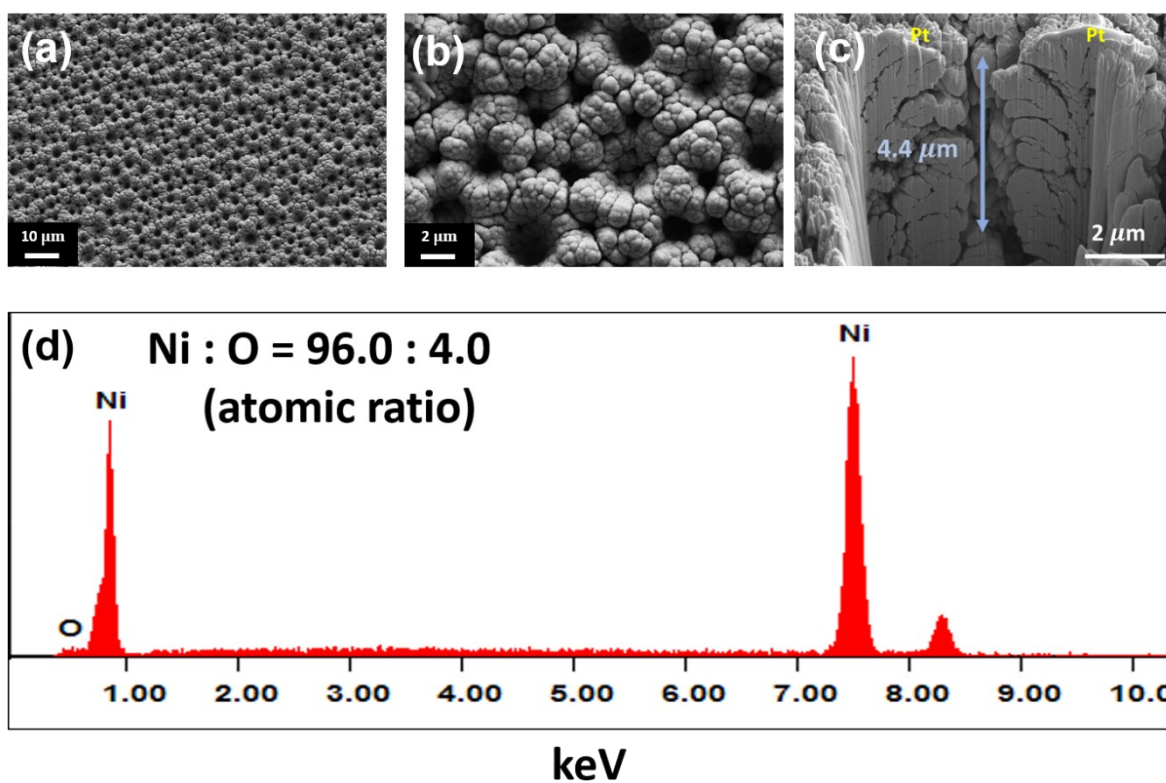

**Figure S4.** SEM images of the HP Ni; (a),(b) surface and (c) cross sectional image in which the Pt layer was coated on top of the sample for protection from ion-beam damage during FIB milling. (d) Spectra of SEM energy dispersive spectroscopy analysis of the HP Ni.

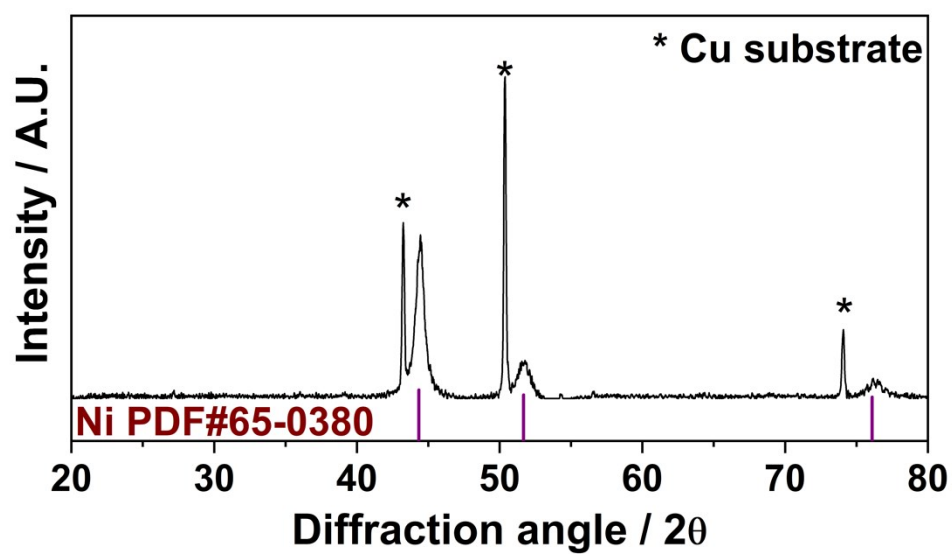

Figure S5. XRD pattern of the HP Ni.

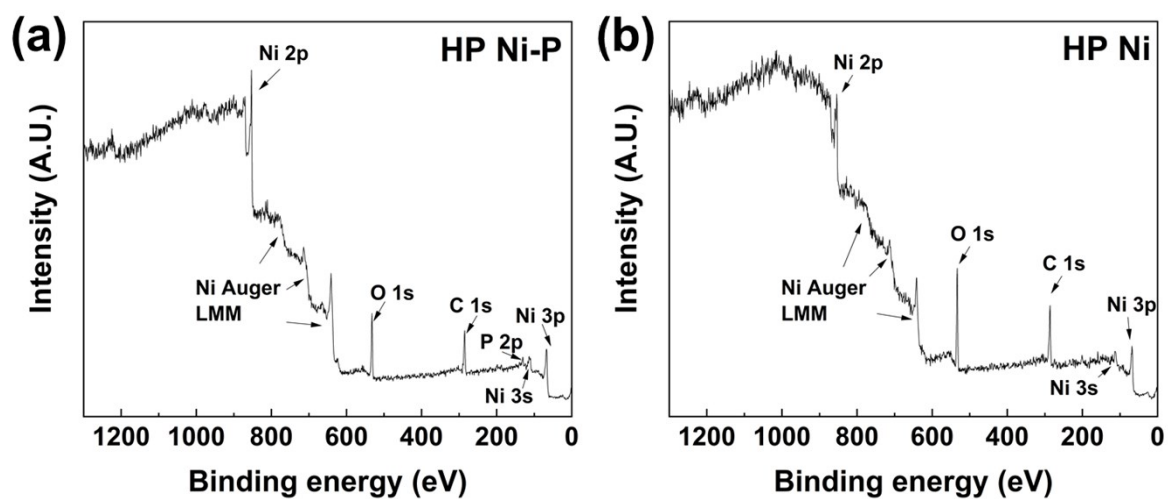

**Figure S6.** XPS survey spectra of (a) HP Ni-P and (b) HP Ni.



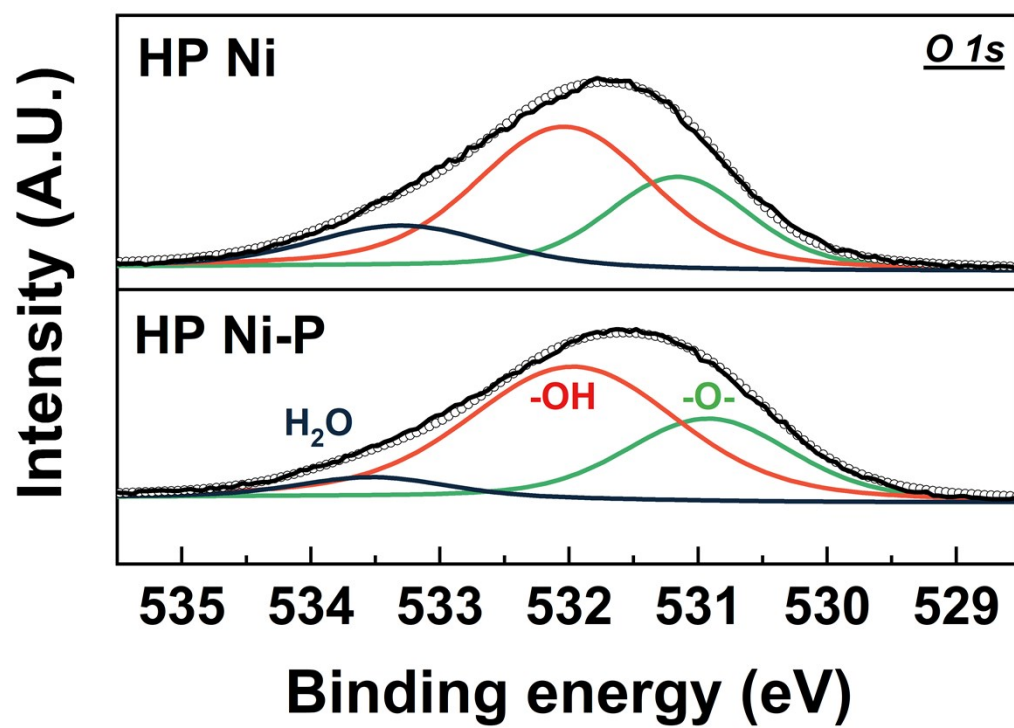

Figure S7. O 1s XPS spectra of the HP Ni and the HP Ni-P



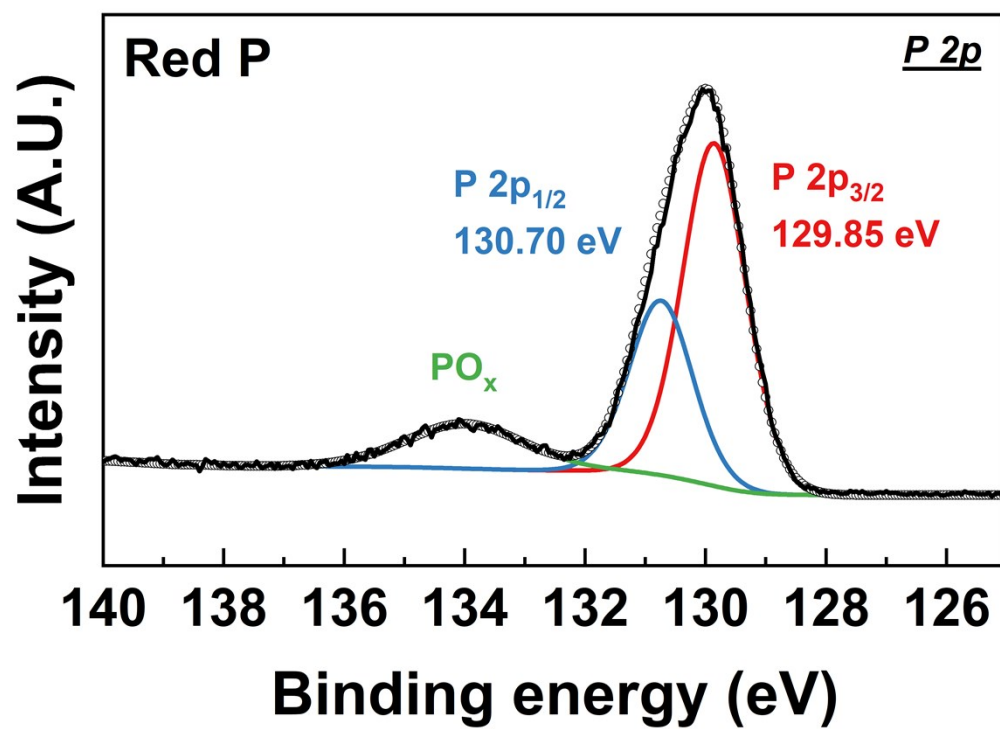

Figure S8. P 2p XPS spectrum of the red phosphorus.

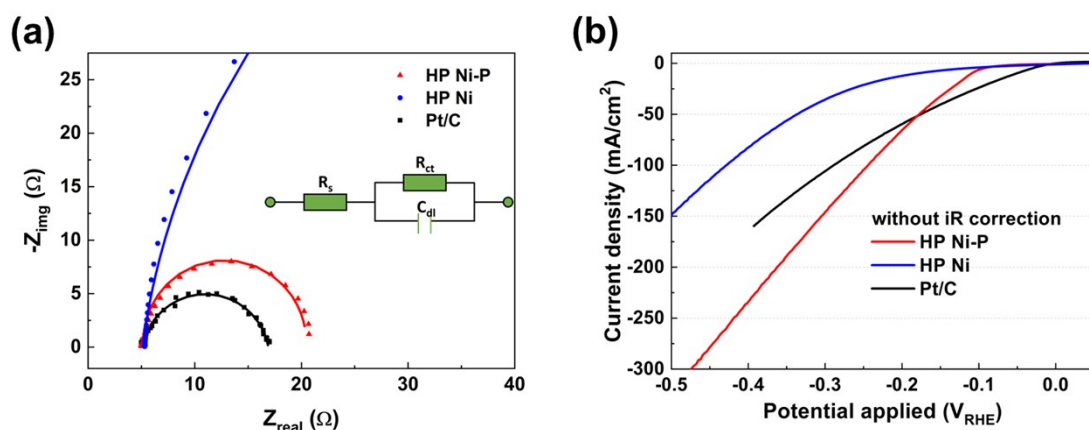

**Figure S9.** (a) Nyquist plots at  $-0.1 \text{ V}_{\text{RHE}}$  and (b) HER polarization curves of the HP Ni-P, HP Ni, and commercial Pt/C in 1 M KOH without  $iR$  correction.

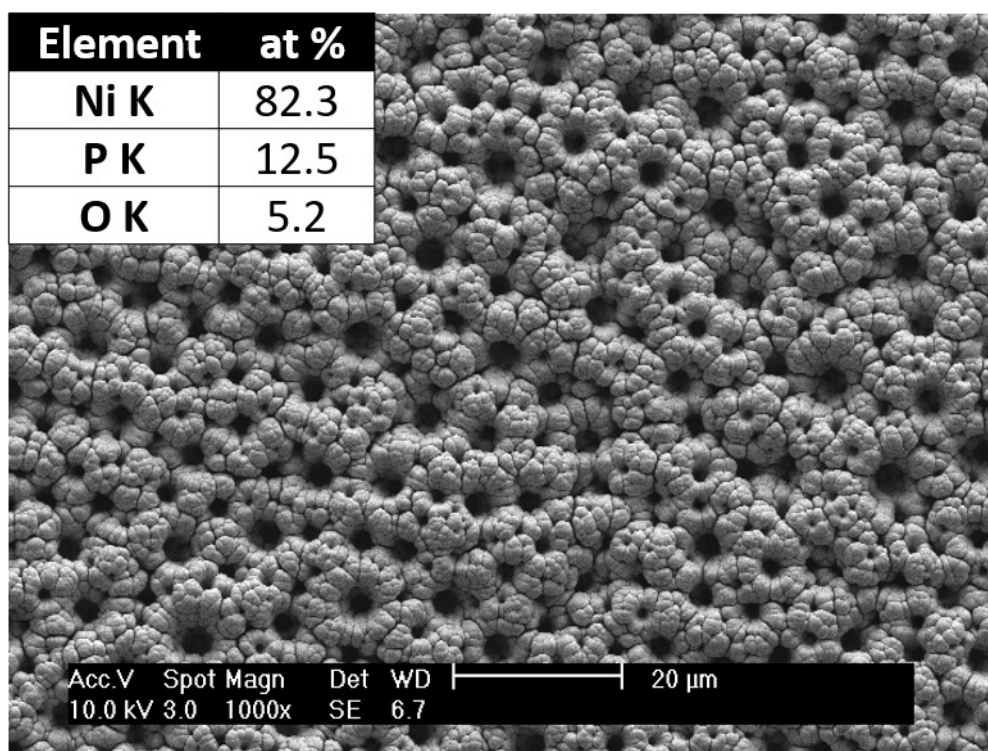

**Figure S10.** SEM image and elemental composition of the HP Ni-P after 10 h chronopotentiometry test at  $-100 \text{ mA/cm}^2$ .

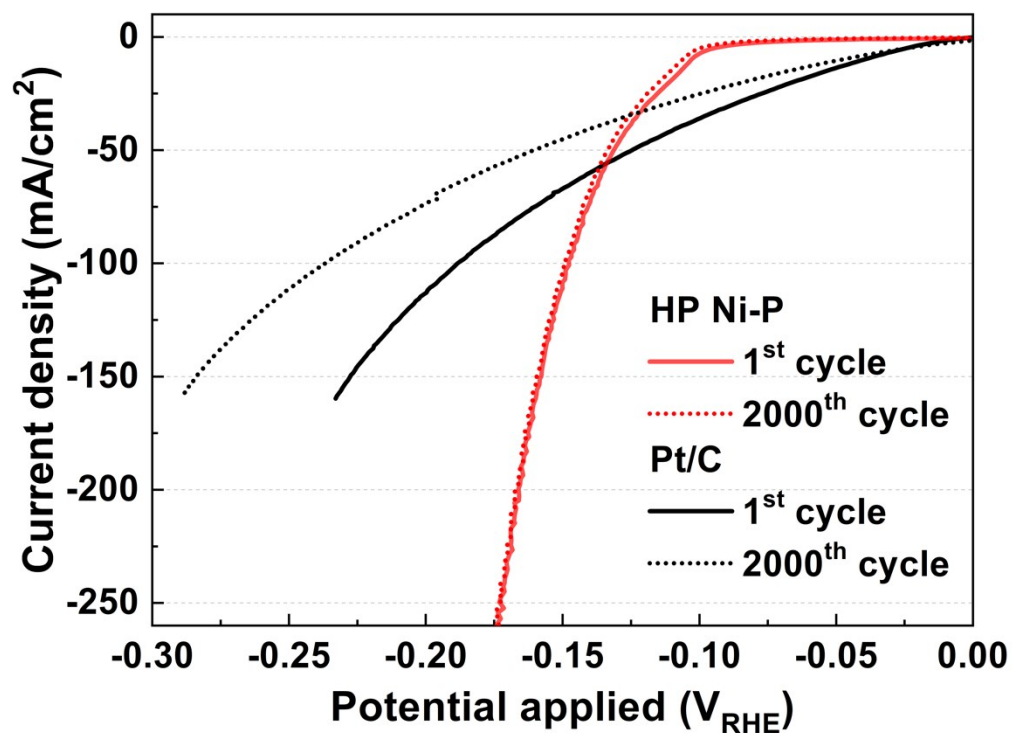

**Figure S11.** HER activities of the HP Ni-P and the Pt/C before and after the potential cycling test from 0 to -0.4 V<sub>RHE</sub> at a scan rate of 100 mV/s for 2000 cycles in 1 M KOH.

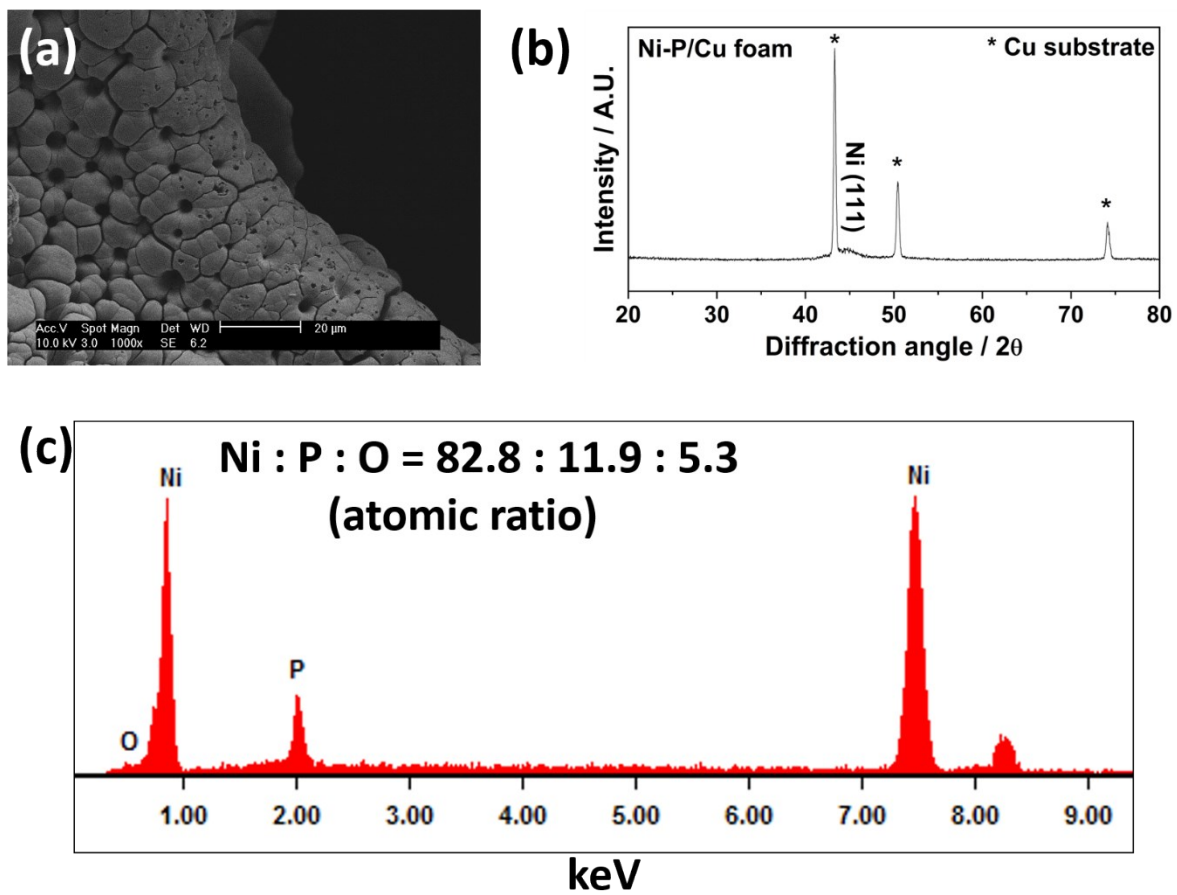

**Figure S12.** (a) SEM images of the HP Ni-P on Cu foam, (b) XRD pattern of the HP Ni-P on Cu foam, (c) Spectra of SEM energy dispersive spectroscopy analysis of the HP N-P on Cu foam.

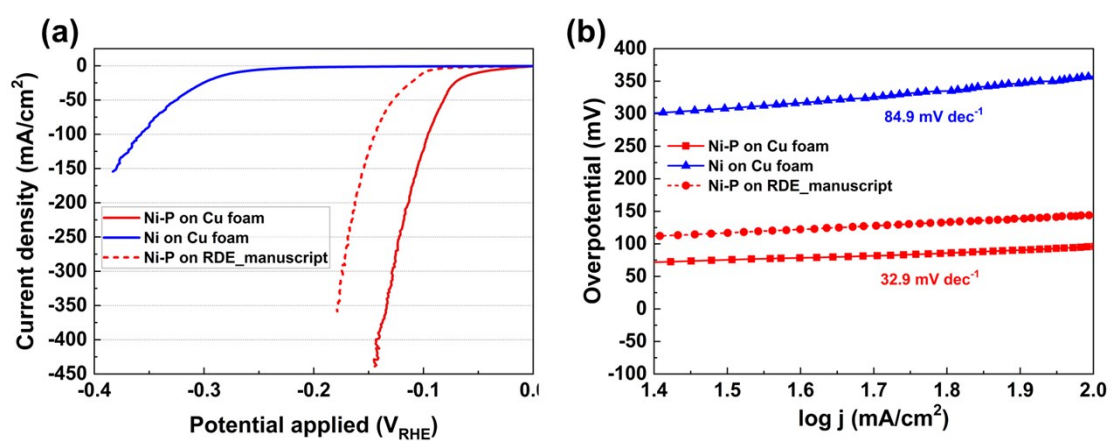

**Figure S13.** HER activities of the HP Ni-P deposited on Cu foam in 1 M KOH. (a) polarization curves, (b) corresponding Tafel plots.

**Table S1.** Comparison of HER catalytic activity and performance with the state-of-the-art transition-metal phosphide or phosphorus catalysts.

| Electrocatalyst                                                                       | Overpotential (mV) at 10 mA/cm <sup>2</sup> | Overpotential (mV) at 100 mA/cm <sup>2</sup> | Tafel slope (mV/dec) | Electrolyte    |
|---------------------------------------------------------------------------------------|---------------------------------------------|----------------------------------------------|----------------------|----------------|
| <b>HP Ni-P on foam (This work)</b>                                                    | <b>52</b>                                   | <b>96</b>                                    | <b>32.9</b>          | <b>1 M KOH</b> |
| HP Ni-P on RDE (This work)                                                            | 99                                          | 144                                          | 37.4                 | 1 M KOH        |
| NiP <sub>1.92</sub> Se <sub>0.08</sub> <sup>1</sup>                                   | 119                                         | 205                                          | 81                   | 1 M KOH        |
| O-NiMoP <sub>2</sub> /NF <sup>2</sup>                                                 | 31                                          | 134                                          | 62.1                 | 1 M KOH        |
| Ni <sub>2(1-x)</sub> Mo <sub>2x</sub> P/NF <sup>3</sup>                               | 72                                          | 162                                          | 46.4                 | 1 M KOH        |
| FeP/Ni <sub>2</sub> P/NF <sup>4</sup>                                                 | 14                                          | 150                                          | 24.2                 | 1 M KOH        |
| Ni <sub>2</sub> P/rGO <sup>5</sup>                                                    | 142                                         | 300                                          | 58                   | 1 M KOH        |
| np-Ni <sub>0.67</sub> Fe <sub>0.33</sub> P <sub>5</sub> <sup>6</sup>                  | 120                                         | 200                                          | 41.8                 | 1 M KOH        |
| NiP <sub>2</sub> /NiO/CF <sup>7</sup>                                                 | 131                                         | 250                                          | 94                   | 1 M KOH        |
| Porous Ni <sub>2</sub> P <sup>8</sup>                                                 | 168                                         | -                                            | 63                   | 1 M KOH        |
| Ni-Co-P <sup>9</sup>                                                                  | 83                                          | 165                                          | 46.6                 | 1 M KOH        |
| Ni <sub>11</sub> (HPO <sub>3</sub> ) <sub>8</sub> (OH) <sub>6</sub> /NF <sup>10</sup> | 42                                          | 130                                          | 102                  | 1 M KOH        |
| O <sub>3</sub> -V <sub>10</sub> -Ni <sub>2</sub> P <sup>11</sup>                      | 108                                         | 280                                          | 72.3                 | 1 M KOH        |
| NiCo <sub>2</sub> P <sub>x</sub> /CNT <sup>12</sup>                                   | 42                                          | 130                                          | 57                   | 1 M KOH        |
| Ni <sub>2</sub> P/NF <sup>13</sup>                                                    | -                                           | 205                                          | 68.9                 | 1 M KOH        |
| Ni <sub>1.85</sub> Fe <sub>0.15</sub> P NSAS/NF <sup>14</sup>                         | 106                                         | 200                                          | 89.7                 | 1 M KOH        |
| Ni <sub>2</sub> P/Ni/NF <sup>15</sup>                                                 | 98                                          | 165                                          | 72                   | 1 M KOH        |
| Ni <sub>2</sub> P/NF <sup>16</sup>                                                    | 220                                         | -                                            | -                    | 1 M KOH        |
| Co-P foam <sup>17</sup>                                                               | 131                                         | -                                            | -                    | 1 M KOH        |
| CoP/C <sup>18</sup>                                                                   | 210                                         | -                                            | -                    | 0.1 M KOH      |



**Table S2.** HER activities of the electrodeposited Ni-P catalysts.

| <b>Electrocatalyst</b>         | <b>Overpotential at<br/>10 mA/cm<sup>2</sup><br/>(mV)</b> | <b>Overpotential at<br/>100 mA/cm<sup>2</sup><br/>(mV)</b> | <b>Tafel slope<br/>(mV/dec)</b> | <b>Loading<br/>amount<br/>(mg/cm<sup>2</sup>)</b> |
|--------------------------------|-----------------------------------------------------------|------------------------------------------------------------|---------------------------------|---------------------------------------------------|
| <b>HP Ni-P<br/>(This work)</b> | <b>52</b>                                                 | <b>96</b>                                                  | <b>32.9</b>                     | <b>4.1</b>                                        |
| amorphous Ni-P <sup>19</sup>   | 115                                                       | 170                                                        | 57.0                            | -                                                 |
| amorphous Ni-P <sup>20</sup>   | 200                                                       | 350                                                        | -                               | -                                                 |
| NiPx <sup>21</sup>             | 120 mV for obtaining 40mA/cm <sup>2</sup>                 |                                                            | -                               | -                                                 |
| Ni-P/Cu foam <sup>22</sup>     | 98                                                        | 150                                                        | 55.0                            | 5.0                                               |
| Ni-P/Ni foam <sup>23</sup>     | 80                                                        | 140                                                        | 50                              | 3.2                                               |
| PSD Ni-10P <sup>24</sup>       | 105                                                       | 230                                                        | 44.7                            | 0.55                                              |
| CuO@Ni-P/CF <sup>25</sup>      | 73                                                        | 160                                                        | 72.0                            | 2.9                                               |
| Ni-Cu-P <sup>26</sup>          | 120                                                       | 175                                                        | 69                              | 21                                                |

### Double-layer capacitance measurement

Electrochemically active surface area was estimated by measuring a double-layer capacitance. To measure the electrochemical double-layer capacitance, the open circuit potential (OCP) was obtained in 1 M KOH. Then, the potential was swept between  $\pm 0.05$  V vs OCP five times at each scan rates (10, 20, 40, 60, 80, 100, 200, 400 mV/s). The electrode was held at both potential vertexes for 10 seconds before conducting the next sweep to minimize the effect of the double-layer formed during the previous seep on the measured current. The measured capacitive currents were plotted as a function of scan rate and a slope showed the specific capacitance which can be converted to ECSA.

### Calculation of electrochemically active surface area (ECSA)

We assumed  $60 \mu\text{F}/\text{cm}^2$  for the double-layer capacitance of theoretically flat Ni by previous reports.<sup>3, 27</sup>

$$\text{Eq. S1: } A_{ECSA}^{Ni-P} = \frac{1.49 \times 10^3 \mu\text{F cm}^{-2}}{60 \mu\text{F cm}^{-2}} = 24.8 \text{ cm}_{ECSA}^2$$

$$\text{Eq. S2: } A_{ECSA}^{Ni} = \frac{2.06 \times 10^3 \mu\text{F cm}^{-2}}{60 \mu\text{F cm}^{-2}} = 34.3 \text{ cm}_{ECSA}^2$$

### Turnover frequency (TOF) calculation.

We used following formula;

$$\text{Eq. S3: } TOF = \frac{\text{Current at a given overpotential (150 mV)}}{\text{Electron number} \times \text{Faraday constant} \times \text{Catalytic sites}} (\text{s}^{-1})$$

We assumed the number of surface sites per surface area for Ni;

$$\text{Eq. S4: } \# \text{ surface sites} = \left( \frac{2 \text{ atoms/unit cell surface}}{3.52 \text{ \AA}^2/\text{unit cell surface}} \right) = 1.614 \times 10^{15}/\text{cm}^2$$

(a) Electron number: 2 (For HER)

(b) Faraday constant:  $96485 \text{ C mol}^{-1}$

(c) The number of Ni atoms on the surface of the electrode (n)

$$= (1.614 \times 10^{15}) \times A_{ECSA}$$

The calculated values are in manuscript.

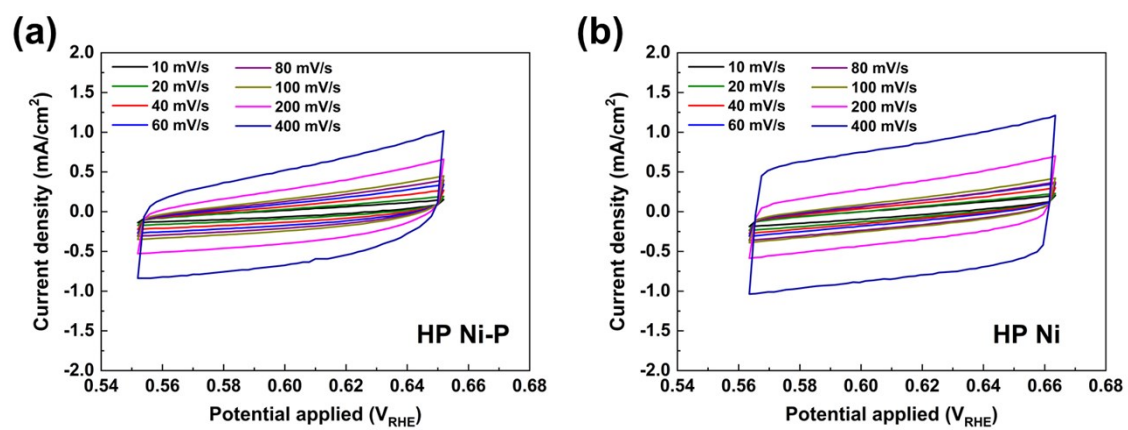

**Figure S14.** Cyclic voltammograms measured at scan rate from 10 to 400 mV/s for (a) the HP Ni-P and (b) the HP Ni.

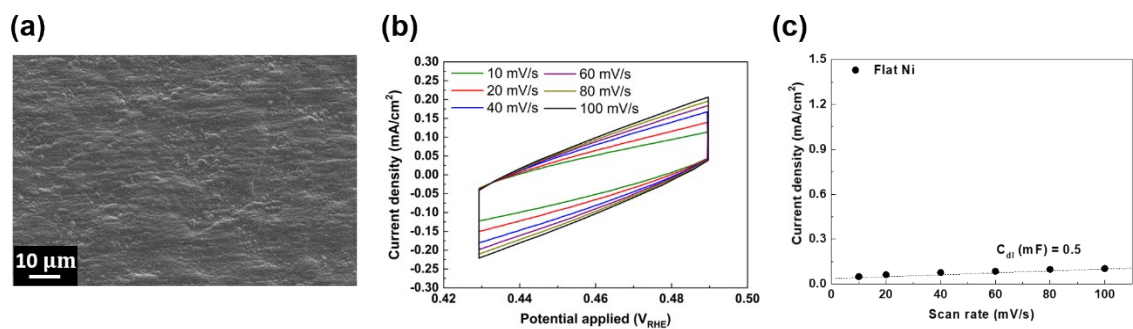

**Figure S15.** (a) SEM image of flat Ni surface, (b) Cyclic voltammograms for flat Ni measured at scan rate from 10 to 100 mV/s, and (c) corresponding capacitive current vs. scan rates plot.

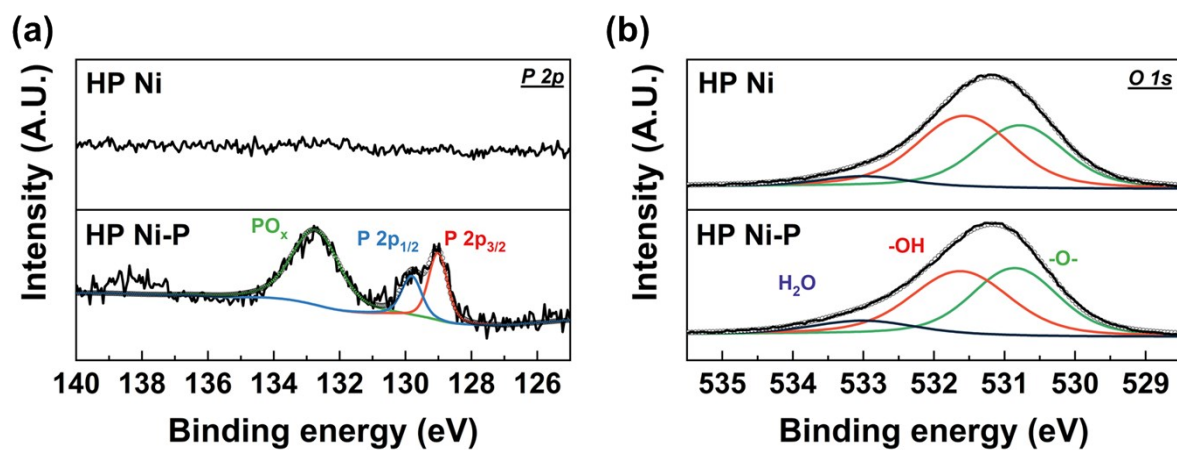

**Figure S16.** XPS results of (a) P 2p and (b) O 1s spectra of the HP Ni and HP Ni-P after HER.

**Table S3.** XPS peak area ratios of Ni<sup>0</sup>, NiO and Ni(OH)<sub>2</sub>/NiOOH to total Ni in HP Ni-P and HP Ni after 10 HER cycles.

|                                 | <b>HP Ni-P</b> | <b>HP Ni</b> |
|---------------------------------|----------------|--------------|
| <b>Ni<sup>0</sup></b>           | 0.4208         | 0.2142       |
| <b>NiO</b>                      | 0.1150         | 0.1334       |
| <b>Ni(OH)<sub>2</sub>/NiOOH</b> | 0.4642         | 0.6524       |



### Evaluation of the amount of Ni<sup>0</sup> on the surface of the catalysts.

In order to obtain an oxidative charge of an initial Ni<sup>0</sup>, as-deposited HP Ni-P and HP Ni were transferred to 1 M KOH immediately with minimal air exposure and oxidized at 0.6V<sub>RHE</sub> for 200s under Ar atmosphere. To measure an oxidative charge of Ni<sup>0</sup> after HER, the HP Ni-P and HP Ni after 10 HER cycles were kept in an open-circuit state for 60s to eliminate adsorbed hydrogen during HER and then oxidized at 0.6V<sub>RHE</sub> in Ar-purged 1 M KOH.

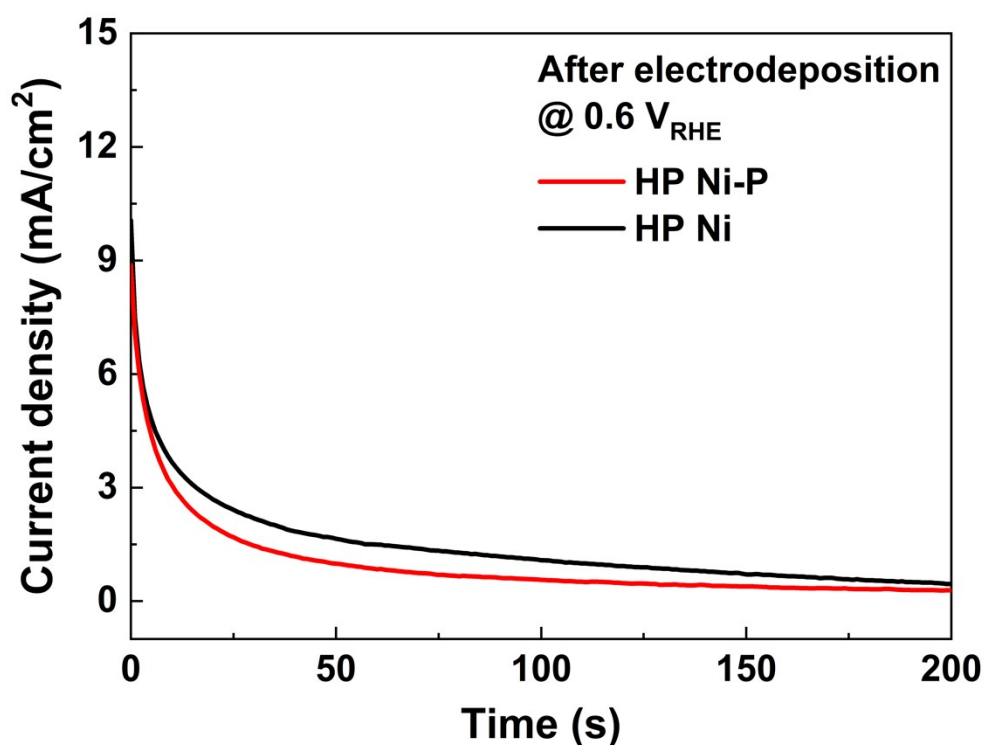

**Figure S17.** The i-t curves of as deposited HP Ni-P and HP Ni at 0.6V<sub>RHE</sub>.

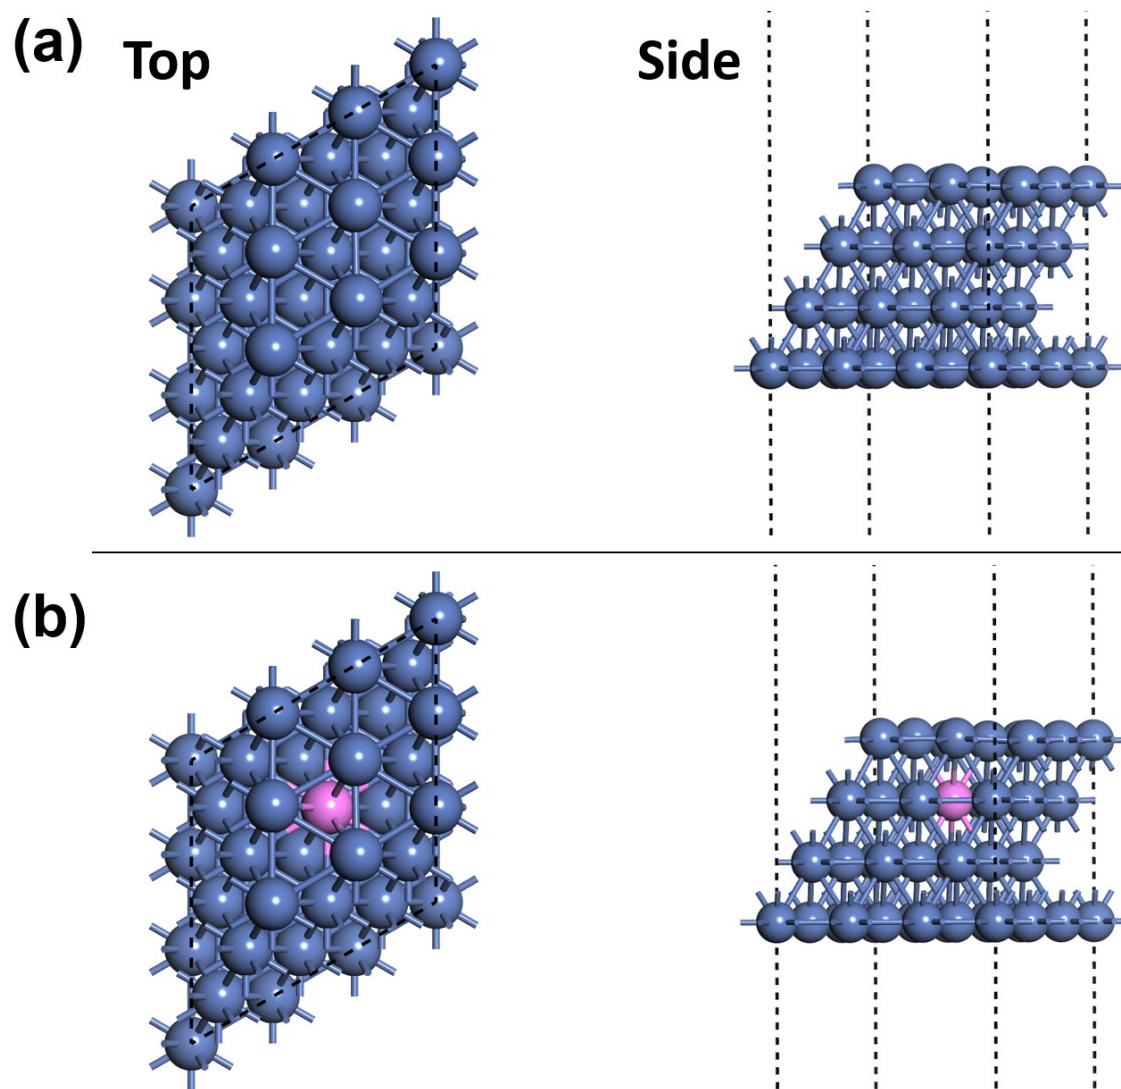

**Figure S18.** Top and side view of (a) Ni (111) and (b) Ni-P (111) models for the DFT calculation. Blue balls: Ni, Pink ball: P.

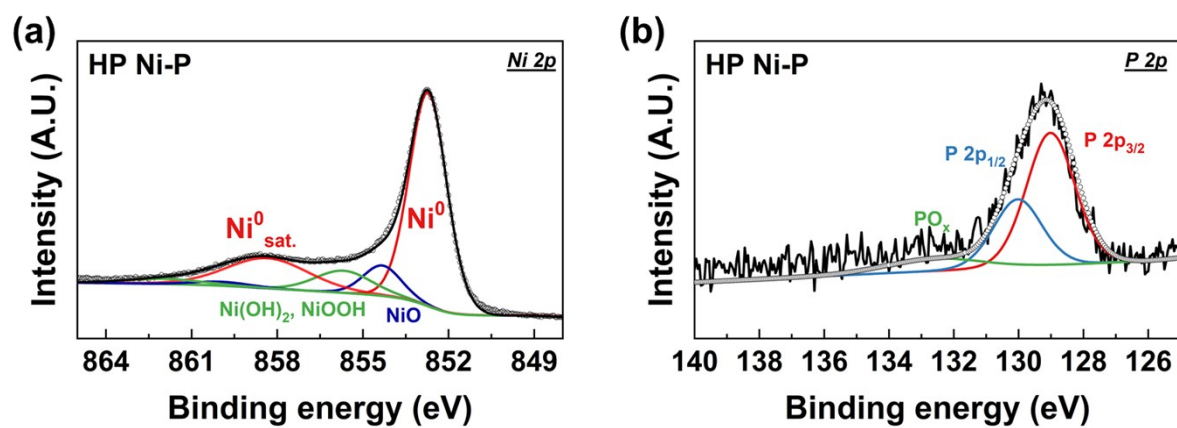

**Figure S19.** XPS spectra of the HP Ni-P after etching the surface layer: (a) Ni 2p and (b) P 2p (Ar sputter condition: 2keV, 1 $\mu$ A, 30sec, etching depth: about 2 nm)

**Table S4.** Calculated free energies of OH and H adsorption.

| OH adsorption energy |          |             |
|----------------------|----------|-------------|
| site                 | Ni (111) | Ni-P (111)  |
| TOP                  | 1.853    | 1.545 (T1)  |
|                      |          | 1.106 (T2)  |
|                      |          | 0.631 (T3)  |
|                      |          | 0.654 (T4)  |
|                      |          | 1.057 (T5)  |
| HCP                  | 0.071    | 0.100 (H1)  |
|                      |          | 0.152 (H2)  |
|                      |          | 0.021 (H3)  |
|                      |          | 0.054 (H4)  |
| FCC                  | -0.028   | -0.020 (F1) |
|                      |          | 0.045 (F2)  |
|                      |          | -0.008 (F3) |
|                      |          | -0.010 (F4) |
| H adsorption energy  |          |             |
| TOP                  | 0.030    | 2.370       |
|                      |          | 0.160       |
|                      |          | 0.137       |
|                      |          | 0.160       |
|                      |          | 0.137       |
| HCP                  | -0.539   | -0.433      |
|                      |          | -0.416      |
|                      |          | -0.497      |
|                      |          | -0.475      |
| FCC                  | -0.555   | -0.459      |
|                      |          | -0.448      |
|                      |          | -0.441      |
|                      |          | -0.441      |

\*Figure S15 shows the adsorption sites for Ni (111) and Ni-P (111)

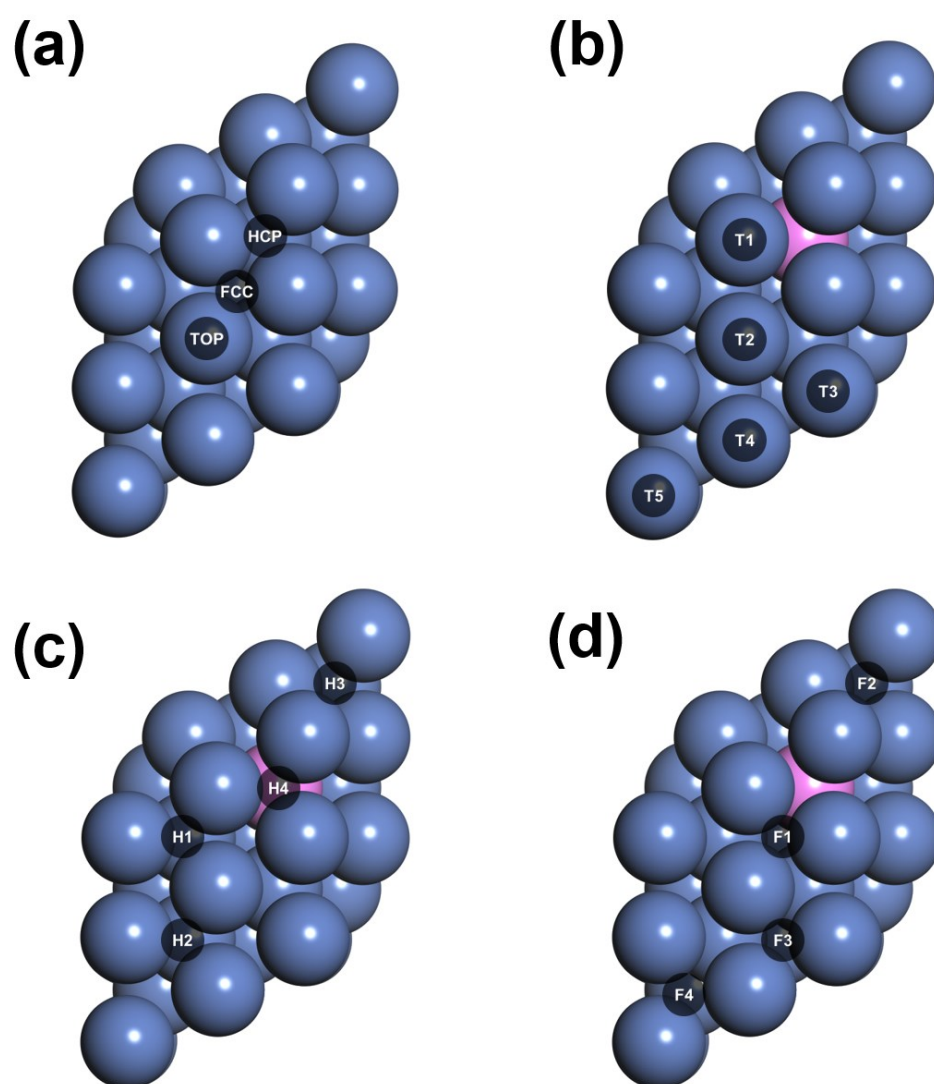

**Figure S20.** Possible adsorption sites for OH and H adsorption on the (a) Ni (111) and (b)-(d) Ni-P (111) surface. (top, hollow-hcp and hollow-fcc)

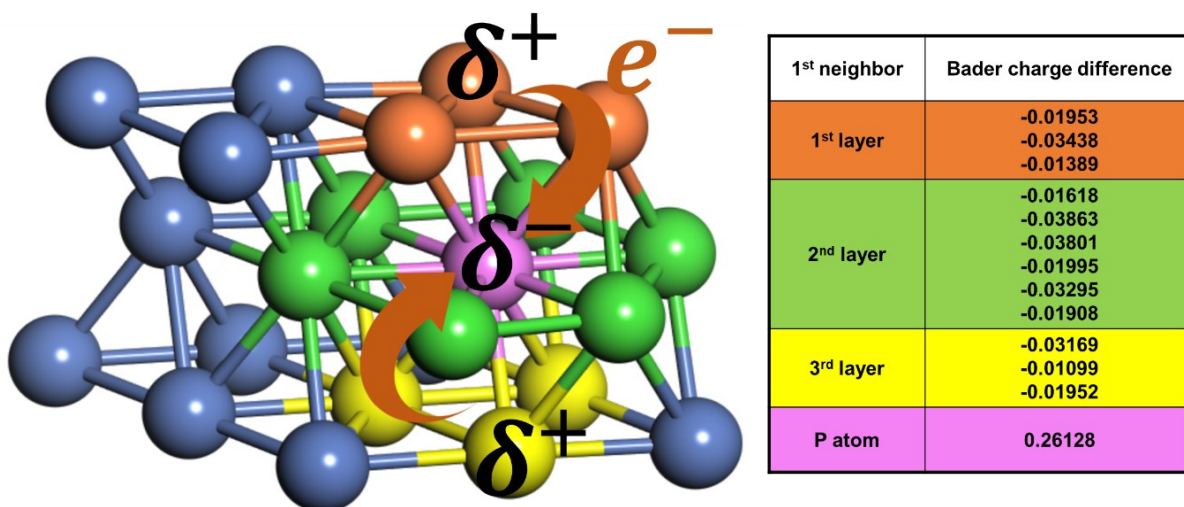

**Figure S21.** Schematic charge transfer of the Ni-P (111) system calculated using Bader charge analysis. Orange, green, yellow-colored Ni atoms represent first-neighbor Ni atoms of the P atom on 1st layer, 2nd layer, and 3rd layer, respectively.

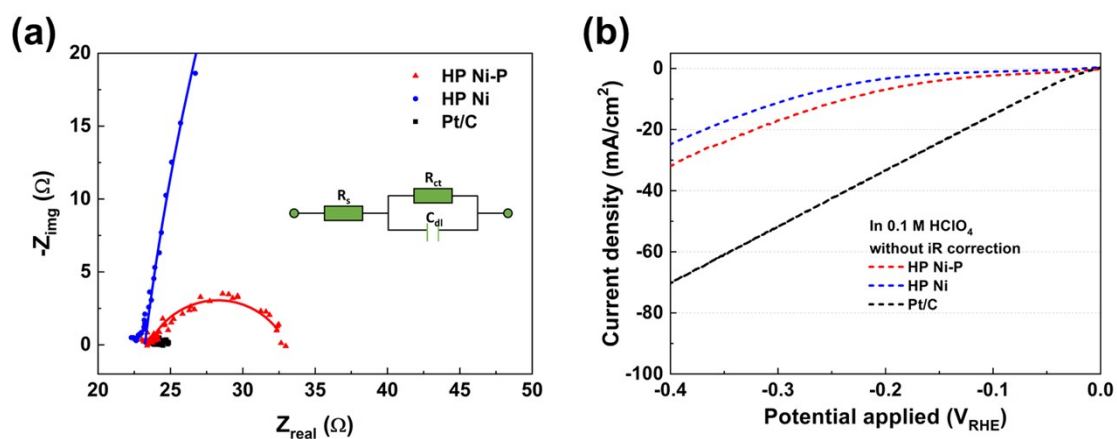

**Figure S22.** (a) Nyquist plots at  $-0.1 \text{ V}_{\text{RHE}}$  and (b) HER polarization curves of the HP Ni-P, HP Ni, and commercial Pt/C in  $0.1 \text{ M HClO}_4$  without iR correction.



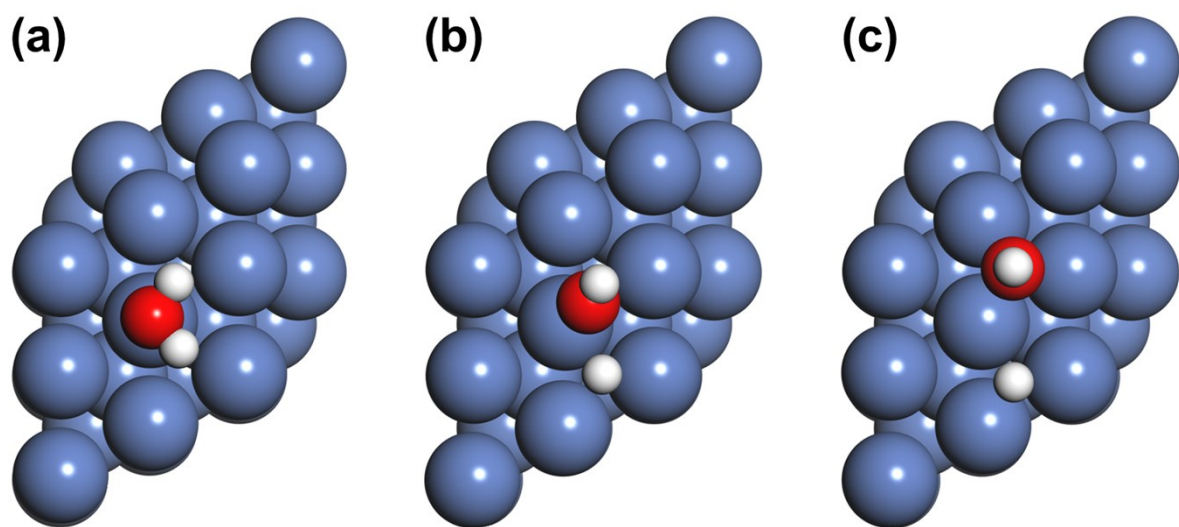

**Figure S23.** The detailed models of Ni (111) with (a) H<sub>2</sub>O adsorption, (b) activated H<sub>2</sub>O adsorption, and (c) OH and H adsorption.

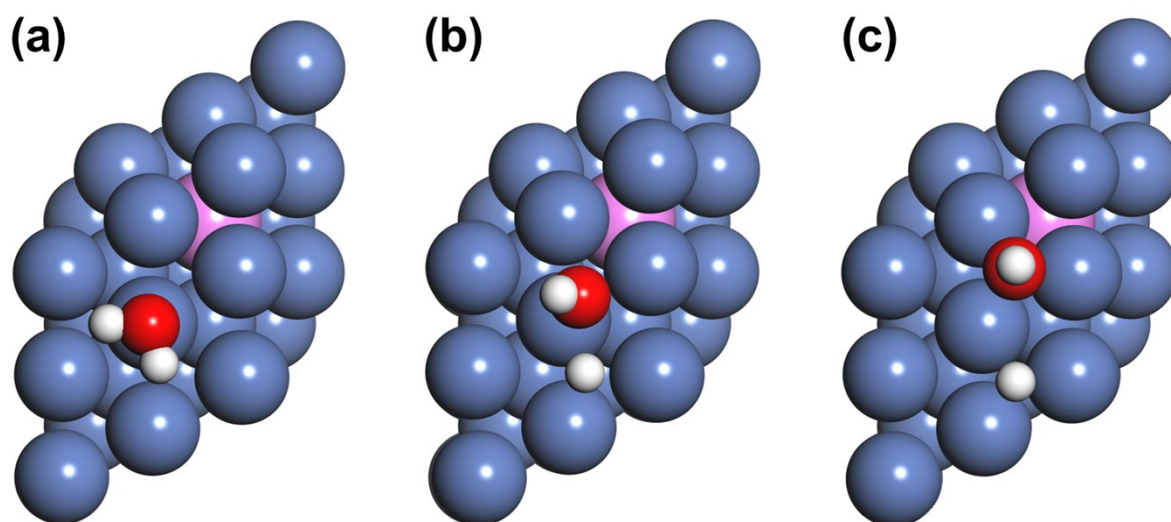

**Figure S24.** The detailed models of Ni-P (111) with (a) H<sub>2</sub>O adsorption, (b) activated H<sub>2</sub>O adsorption, and (c) OH and H adsorption.

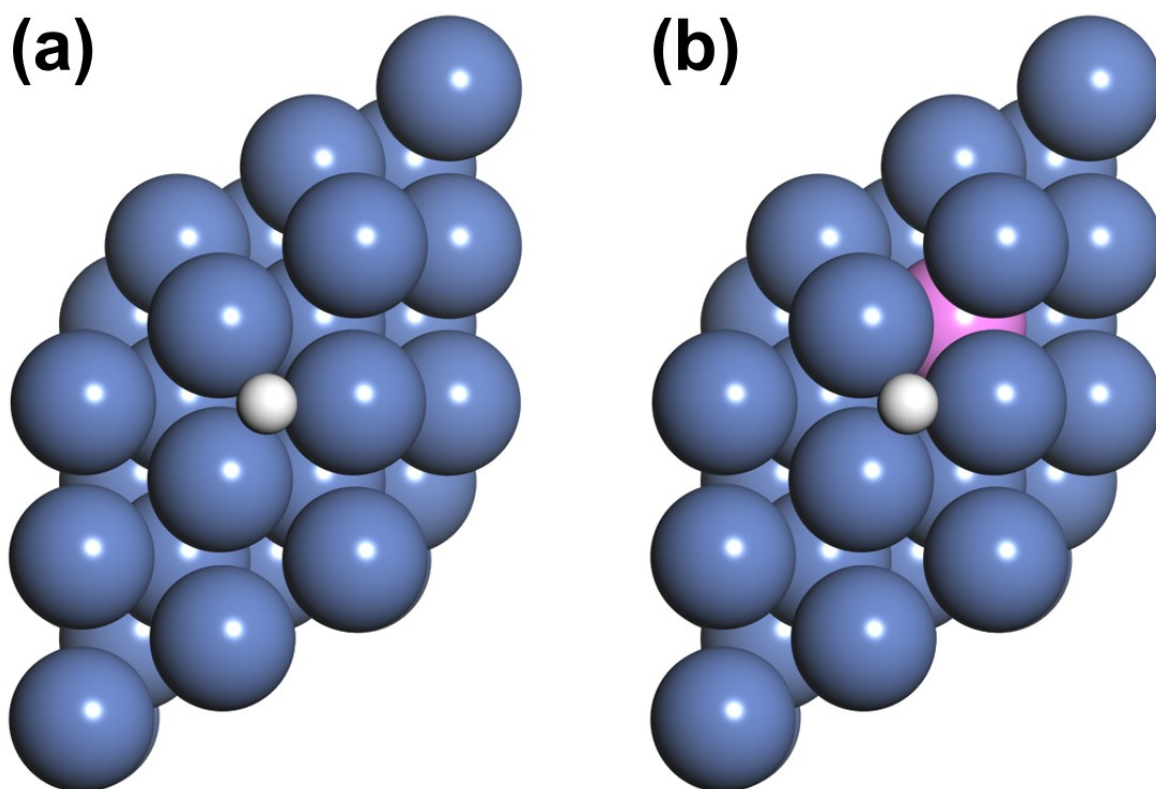

**Figure S25.** The detailed models of (a) Ni (111) with H adsorption, and (b) Ni-P (111) with H adsorption.

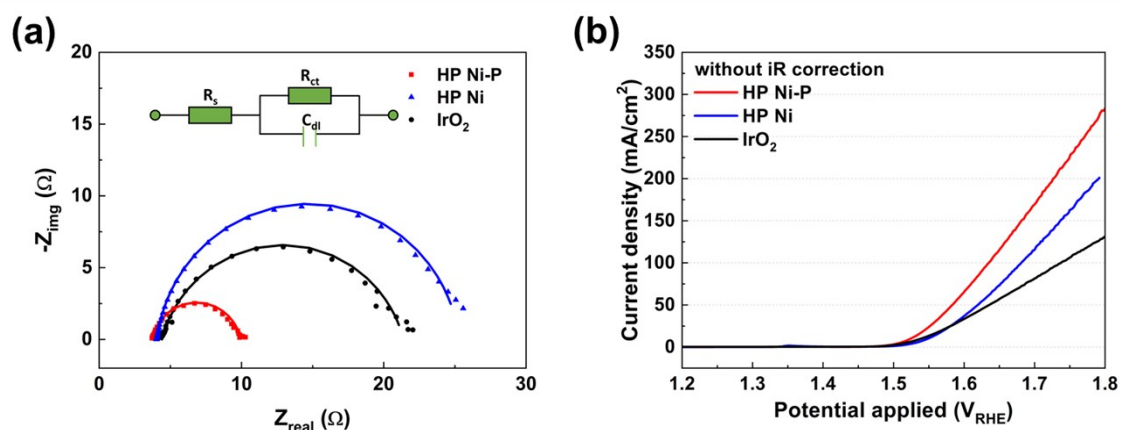

**Figure S26.** (a) Nyquist plots at 1.53 V<sub>RHE</sub> and (b) OER polarization curves of the HP Ni-P, HP Ni, and commercial IrO<sub>2</sub> in 1 M KOH without iR correction.

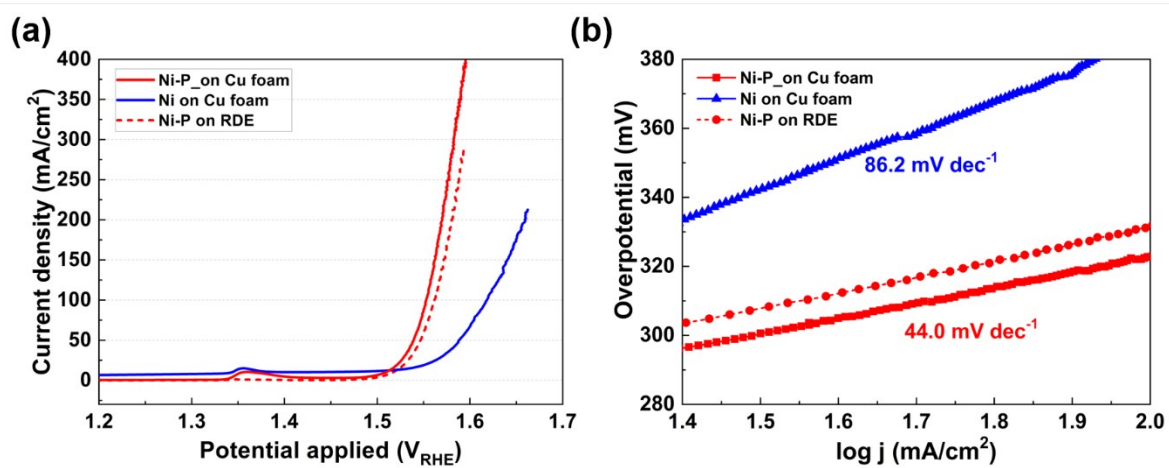

**Figure S27.** OER activities of the HP Ni-P deposited on Cu foam in 1 M KOH. (a) polarization curves, (b) corresponding Tafel plots.

**Table S5.** Comparison of OER catalytic activity and performance with the state-of-the-art bifunctional transition-metal phosphide or phosphorus catalysts.

| Electrocatalyst                                                                      | Overpotential (mV) at 10 mA/cm <sup>2</sup> | Overpotential (mV) at 100 mA/cm <sup>2</sup> | Tafel slope (mV/dec) | Electrolyte    |
|--------------------------------------------------------------------------------------|---------------------------------------------|----------------------------------------------|----------------------|----------------|
| <b>HP Ni-P on foam (This work)</b>                                                   | <b>279</b>                                  | <b>323</b>                                   | <b>44.0</b>          | <b>1 M KOH</b> |
| HP Ni-P on RDE (This work)                                                           | 286                                         | 331                                          | 39.5                 | 1 M KOH        |
| Ni <sub>2</sub> P/rGO <sup>5</sup>                                                   | 260                                         | 480                                          | 62                   | 1 M KOH        |
| np-Ni <sub>0.67</sub> Fe <sub>0.33</sub> P <sub>5</sub> <sup>6</sup>                 | 245                                         | 580                                          |                      | 1 M KOH        |
| Porous Ni <sub>2</sub> P <sup>8</sup>                                                | 320                                         | -                                            | 106                  | 1 M KOH        |
| Ni <sub>11</sub> (HPO <sub>3</sub> ) <sub>8</sub> (OH) <sub>6</sub> NF <sup>10</sup> | 245                                         | 280                                          | 102                  | 1 M KOH        |
| O <sub>3</sub> -V <sub>10</sub> -Ni <sub>2</sub> P <sup>11</sup>                     | 257                                         | 300                                          | 43.5                 | 1 M KOH        |
| NiCo <sub>2</sub> P <sub>x</sub> /CNT <sup>12</sup>                                  | 284                                         | -                                            | 50.3                 | 1 M KOH        |
| Ni <sub>2</sub> P/NF <sup>13</sup>                                                   | -                                           | 300                                          | 84.6                 | 1 M KOH        |
| Ni <sub>1.85</sub> Fe <sub>0.15</sub> P NSAS/NF <sup>14</sup>                        | -                                           | 320                                          | 96                   | 1 M KOH        |
| Ni <sub>2</sub> P/Ni/NF <sup>15</sup>                                                | 200                                         | 268                                          | -                    | 1 M KOH        |
| Ni <sub>2</sub> P/NF <sup>16</sup>                                                   | 290                                         | -                                            | 47                   | 1 M KOH        |
| Co-P foam <sup>17</sup>                                                              | 300                                         | -                                            | 74                   | 1 M KOH        |
| CoP/C <sup>18</sup>                                                                  | 360                                         | -                                            | 66                   | 0.1 M KOH      |

**Table S6.** OER activities of the electrodeposited Ni-P catalysts.

| <b>Electrocatalyst</b>         | <b>Overpotential at<br/>10 mA/cm<sup>2</sup><br/>(mV)</b> | <b>Overpotential at<br/>100 mA/cm<sup>2</sup><br/>(mV)</b> | <b>Tafel slope<br/>(mV/dec)</b> | <b>Loading<br/>amount<br/>(mg/cm<sup>2</sup>)</b> |
|--------------------------------|-----------------------------------------------------------|------------------------------------------------------------|---------------------------------|---------------------------------------------------|
| <b>HP Ni-P<br/>(This work)</b> | <b>279</b>                                                | <b>323</b>                                                 | <b>44.0</b>                     | <b>4.1</b>                                        |
| Ni-P/Cu foam <sup>22</sup>     | 325                                                       | 430                                                        | 120.0                           | 5.0                                               |
| Ni-P/Ni foam <sup>23</sup>     | 309                                                       | 390                                                        | 58.0                            | 3.2                                               |
| CuO@Ni-P/CF <sup>25</sup>      | -                                                         | 370                                                        | 124.9                           | 2.9                                               |



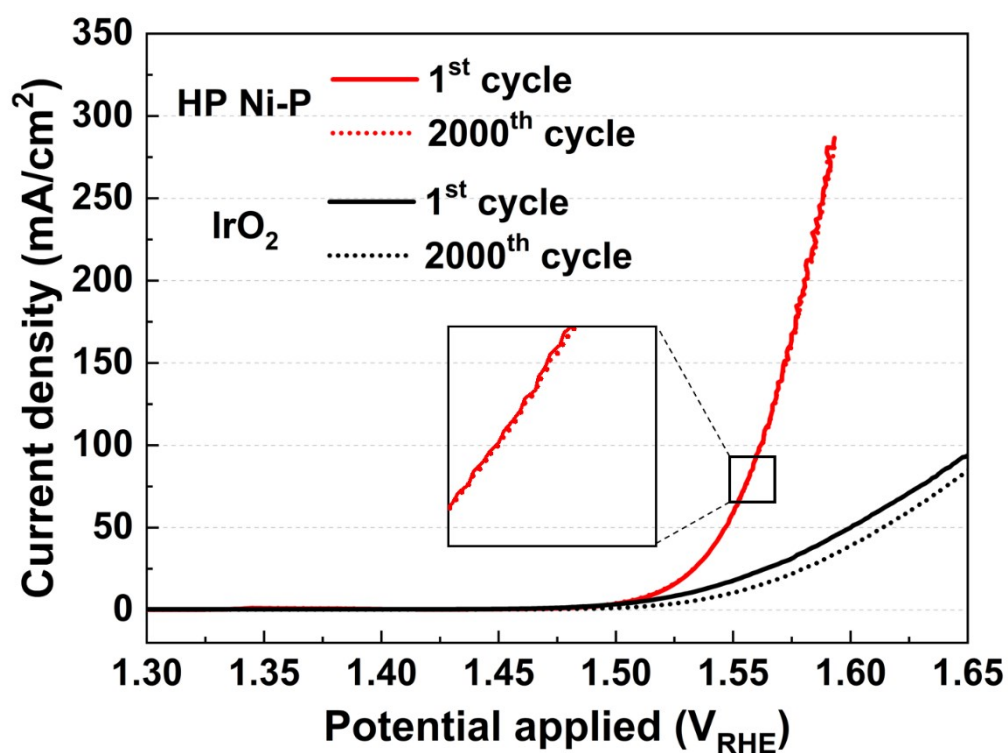

**Figure S28.** OER activities of the HP Ni-P and the IrO<sub>2</sub> before and after the potential cycling test from 1.3 to 1.7 V<sub>RHE</sub> at a scan rate of 100 mV/s for 2000 cycles in 1 M KOH.

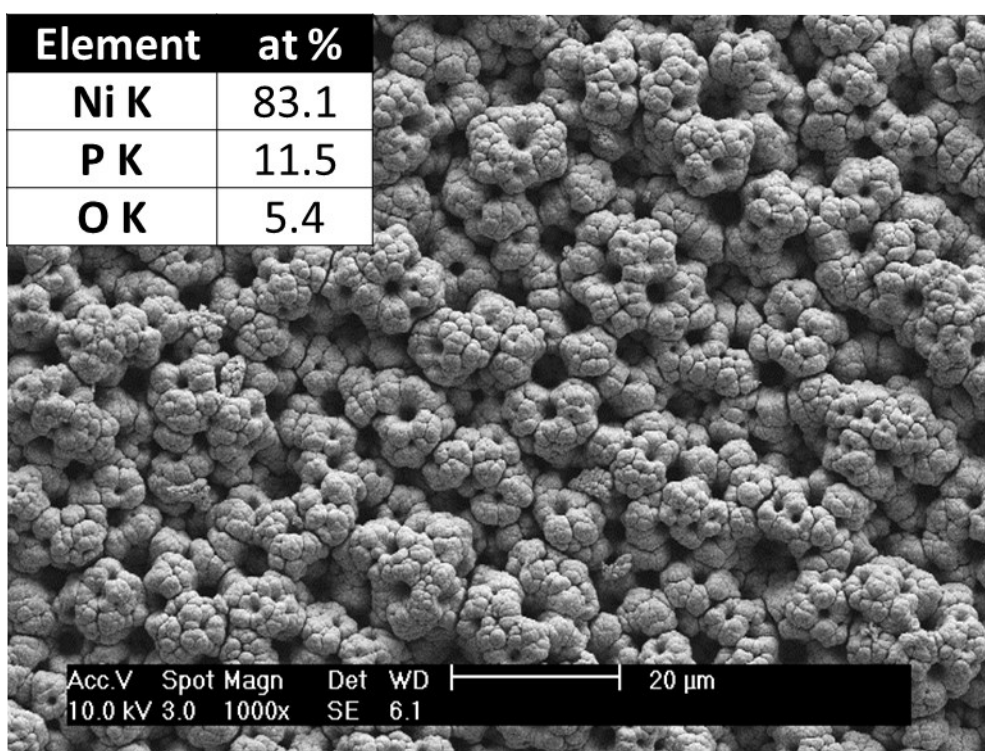

**Figure S29.** SEM image and elemental composition of the HP Ni-P after 10 h chronopotentiometry test at 100 mA/cm<sup>2</sup>.

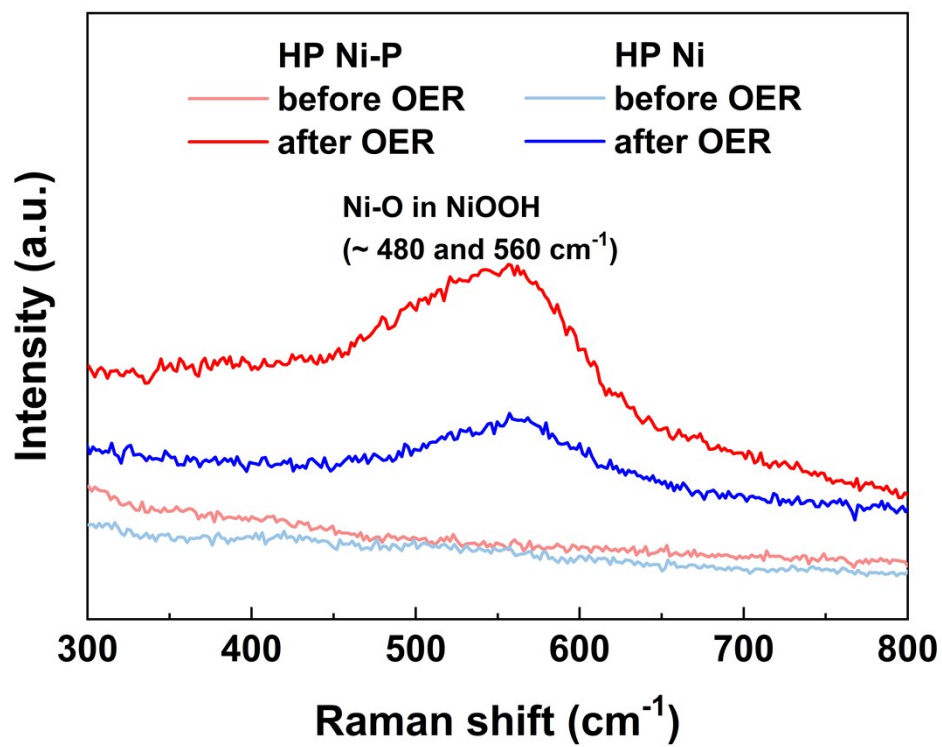

**Figure S30.** Raman spectra of the HP Ni-P and HP Ni before and after OER.

**Table S7.** Elemental composition of Ni, O, and P for HP Ni-P and HP Ni after 50 OER cycles obtained from XPS analysis.

|                  | <b>Ni %</b> | <b>O %</b> | <b>P %</b> |
|------------------|-------------|------------|------------|
| <b>Pristine</b>  | 44.32       | 46.39      | 9.29       |
| <b>After HER</b> | 32.85       | 60.07      | 7.08       |
| <b>After OER</b> | 25.55       | 74.45      | -          |

### Determination of phosphate

To demonstrate the dissolution mechanism of phosphorus during OER, a simple qualitative method was adopted to determine the presence of phosphate ions in a 1 M KOH-after OER. The method involves the molybdenum blue formation reaction;

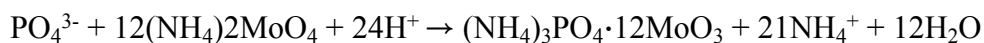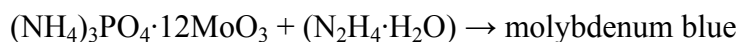

The absorbance of formed molybdenum blue is measured from 800 to 900 nm.  $\lambda_{\text{max}}$ , presented between 800 to 900 nm, means the presence of phosphate in the solution.

The detection solution was prepared by modifying previous reports.<sup>28, 29</sup> To obtain 1 M KOH-after OER enriched with phosphate ion, twenty HP Ni-P electrodes were used for oxygen evolution reaction in 50 ml of 1 M KOH. The obtained 1 M KOH was acidified with 5 M  $\text{H}_2\text{SO}_4$ . Then, all solution was mixed and the absorbances of solution was measured by UV-Vis spectrophotometer. For comparison, the absorbance of as-prepared 1 M KOH was also measured.

In Fig. S19,  $\lambda_{\text{max}}$  was observed around 850-860 nm indicating the presence of phosphate ion in the 1 M KOH-after OER.

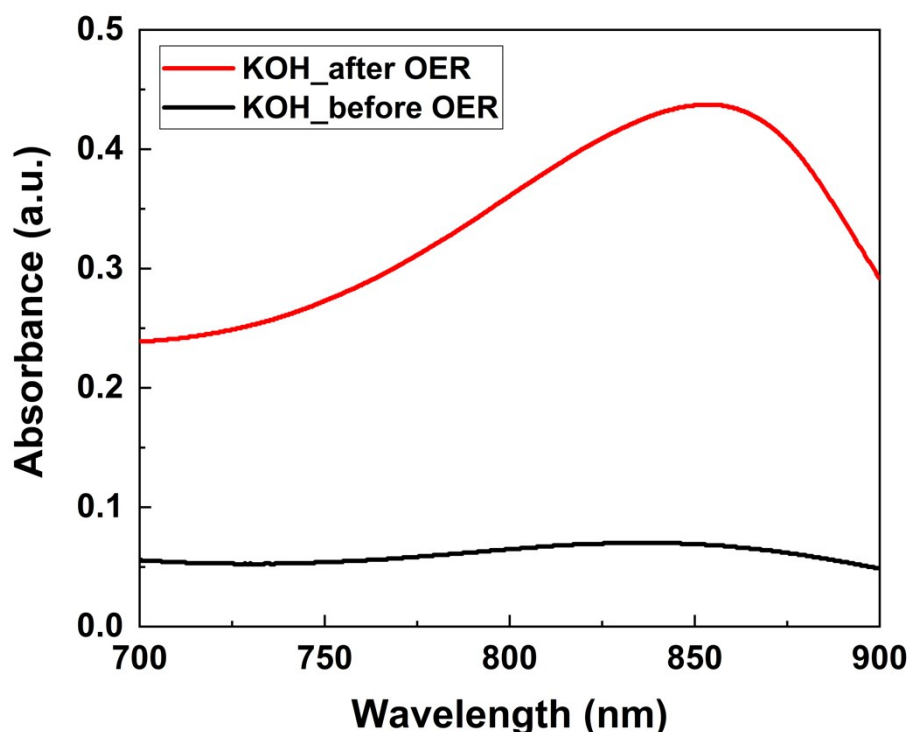

**Figure S31.** UV-Vis absorption spectra of (a) 1 M KOH used for OER of 20 HP Ni-P electrodes, (b) as prepared 1 M KOH.

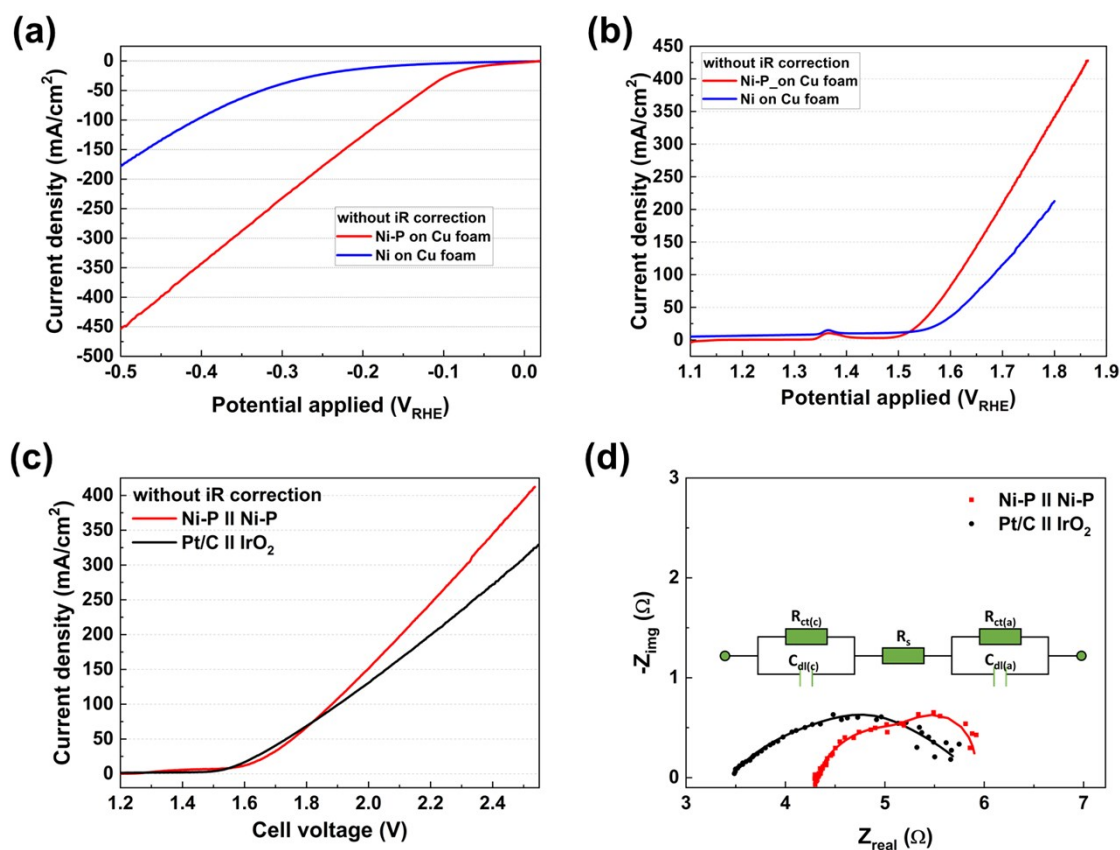

**Figure S32.** Polarization curves of the Ni-P and Ni on Cu foams without iR correction for (a) HER and (b) OER in 1 M KOH. (c) Water electrolysis performance without iR correction and (d) Nyquist plots at 1.8 V of the Ni-P || Ni-P and Pt/C || IrO<sub>2</sub> cells in 1 M KOH.

**Table S8.** Cell voltages of the Ni-P || Ni-P and Pt/C || IrO<sub>2</sub> electrolyzer at current densities of 20, 50, 100 and 200 mA/cm<sup>2</sup> measured from their polarization curves and chronopotentiometric curves in Fig. 5.

|                         |                              | Ni-P    Ni-P       |                            |               | Pt/C    IrO <sub>2</sub> |                            |               |
|-------------------------|------------------------------|--------------------|----------------------------|---------------|--------------------------|----------------------------|---------------|
|                         |                              | Polarization curve | Chronopotentiometric curve |               | Polarization curve       | Chronopotentiometric curve |               |
|                         |                              |                    | Starting point*            | Ending point* |                          | Starting point*            | Ending point* |
| <b>Cell Voltage (V)</b> | <b>20 mA/cm<sup>2</sup></b>  | 1.611              | 1.616                      | 1.612         | 1.574                    | 1.571                      | 1.589         |
|                         | <b>50 mA/cm<sup>2</sup></b>  | 1.657              | 1.653                      | 1.653         | 1.630                    | 1.681                      | 1.697         |
|                         | <b>100 mA/cm<sup>2</sup></b> | 1.687              | 1.678                      | 1.681         | 1.694                    | 1.780                      | 1.792         |
|                         | <b>200 mA/cm<sup>2</sup></b> | 1.715              | 1.707                      | 1.707         | 1.780                    | 1.903                      | 2.109         |

\*: The cell voltages were measured from the starting point and ending point of the chronopotentiometric curves at each current density section.

## Reference

1. Y.-C. Chu, C.-J. Chang, Y. Zhu, S.-C. Lin, C.-W. Tung, T.-L. Chen and H. M. Chen, *ACS Sustainable Chemistry & Engineering*, 2019, **7**, 14247-14255.
2. L. Zhang, X. Wang, X. Zheng, L. Peng, J. Shen, R. Xiang, Z. Deng, L. Li, H. Chen and Z. Wei, *ACS Applied Energy Materials*, 2018, **1**, 5482-5489.
3. L. Yu, I. K. Mishra, Y. Xie, H. Zhou, J. Sun, J. Zhou, Y. Ni, D. Luo, F. Yu and Y. Yu, *Nano Energy*, 2018, **53**, 492-500.
4. F. Yu, H. Zhou, Y. Huang, J. Sun, F. Qin, J. Bao, W. A. Goddard III, S. Chen and Z. Ren, *Nature communications*, 2018, **9**, 2551.
5. L. Yan, H. Jiang, Y. Xing, Y. Wang, D. Liu, X. Gu, P. Dai, L. Li and X. Zhao, *Journal of Materials Chemistry A*, 2018, **6**, 1682-1691.
6. W. Xu, S. Zhu, Y. Liang, Z. Cui, X. Yang and A. Inoue, *Journal of Materials Chemistry A*, 2018, **6**, 5574-5579.
7. M. Wu, P. Da, T. Zhang, J. Mao, H. Liu and T. Ling, *ACS Appl. Mater. Interfaces*, 2018, **10**, 17896-17902.
8. Q. Wang, Z. Liu, H. Zhao, H. Huang, H. Jiao and Y. Du, *Journal of Materials Chemistry A*, 2018, **6**, 18720-18727.
9. J. Mu, J. Li, E.-C. Yang and X.-J. Zhao, *ACS Applied Energy Materials*, 2018, **1**, 3742-3751.
10. P. W. Menezes, C. Panda, S. Loos, F. Bunschei-Bruns, C. Walter, M. Schwarze, X. Deng, H. Dau and M. Driess, *Energy Environ. Sci.*, 2018, **11**, 1287-1298.
11. K. N. Dinh, X. Sun, Z. Dai, Y. Zheng, P. Zheng, J. Yang, J. Xu, Z. Wang and Q. Yan, *Nano Energy*, 2018, **54**, 82-90.
12. C. Huang, T. Ouyang, Y. Zou, N. Li and Z.-Q. Liu, *Journal of Materials Chemistry A*, 2018, **6**, 7420-7427.
13. X.-D. Wang, Y. Cao, Y. Teng, H.-Y. Chen, Y.-F. Xu and D.-B. Kuang, *ACS Appl. Mater. Interfaces*, 2017, **9**, 32812-32819.
14. P. Wang, Z. Pu, Y. Li, L. Wu, Z. Tu, M. Jiang, Z. Kou, I. S. Amiinu and S. Mu, *ACS Appl. Mater. Interfaces*, 2017, **9**, 26001-26007.
15. B. You, N. Jiang, M. Sheng, M. W. Bhushan and Y. Sun, *ACS Catalysis*, 2016, **6**, 714-721.
16. L.-A. Stern, L. Feng, F. Song and X. Hu, *Energy Environ. Sci.*, 2015, **8**, 2347-2351.
17. S. Oh, H. Kim, Y. Kwon, M. Kim, E. Cho and H. Kwon, *Journal of Materials Chemistry A*, 2016, **4**, 18272-18277.
18. J. Ryu, N. Jung, J. H. Jang, H.-J. Kim and S. J. Yoo, *Acs Catalysis*, 2015, **5**, 4066-4074.
19. I. Paseka, *Electrochimica Acta*, 1995, **40**, 1633-1640.
20. I. Paseka, *Electrochimica acta*, 1999, **44**, 4551-4558.
21. T. Burchardt, *Int. J. Hydrog. Energy*, 2001, **26**, 1193-1198.
22. Q. Liu, S. Gu and C. M. Li, *Journal of Power Sources*, 2015, **299**, 342-346.
23. C. Tang, A. M. Asiri, Y. Luo and X. Sun, *ChemNanoMat*, 2015, **1**, 558-561.
24. C. Sun, J. Zeng, H. Lei, W. Yang and Q. Zhang, *ACS Sustainable Chemistry & Engineering*, 2018, **7**, 1529-1537.
25. B. Chang, S. Hao, Z. Ye and Y. Yang, *Chemical Communications*, 2018, **54**, 2393-2396.
26. M. Cao, Z. Xue, J. Niu, J. Qin, M. Sawangphruk, X. Zhang and R. Liu, *ACS Appl. Mater. Interfaces*, 2018, **10**, 35224-35233.



27. J. Kibsgaard, C. Tsai, K. Chan, J. D. Benck, J. K. Nørskov, F. Abild-Pedersen and T. F. Jaramillo, *Energy Environmental Science*, 2015, **8**, 3022-3029.
28. M. Kumar, M. S. A. Galil, M. Suresha, M. Sathish and G. Nagendrappa, *Journal of Chemistry*, 2007, **4**, 467-473.
29. S. Pradhan and M. R. Pokhrel, *Scientific world*, 2013, **11**, 58-62.
